# Supplementary material for: Hot-starting software containers for STAR aligner
Source: PubMed Central journal article supplement (PMC6131214; doi:10.1093/gigascience/giy092), 2018-07-31
Supplement: giy092_response_to_reviewer_comments_revision1.pdf [file giy092_response_to_reviewer_comments_revision1.pdf]

## Author's Response To Reviewer Comments

Close

Thank you for the opportunity to publish in Gigascience. We added the following reference to the manuscript as instructed.

[22] Zhang, P; Hung, L, H; Lloyd, W; Yeung, K, Y (2018): Supporting data for "Hot-starting software containers for STAR aligner" GigaScience Database.  
<http://dx.doi.org/10.5524/100468>

Close
